# Supplementary material for: Hydrophobic interaction is the dominant mechanism of zwitterionic PFAS adsorption to carbon-based sorptive materials in water and soil
Source: Royal Society of Chemistry journal article supplement (doi:10.1039/d3ew00550j), 2023-11-29
Supplement: d3ew00550j1.pdf [file d3ew00550j1.pdf]

## Hydrophobic interaction is the dominant mechanism of zwitterionic PFAS adsorption to carbon-based sportive materials in solution and soil

Table S1: Artificial soil pore water (SPW) composition measured by ICP-OES and used in batch sorption experiments.

| Compound name                                        | Concentration in the artificial SPW (mM) | Cation concentration (mg/L) |       |
|------------------------------------------------------|------------------------------------------|-----------------------------|-------|
| Calcium sulfate-CaSO <sub>4</sub>                    | 4                                        | Magnesium                   | 26.4  |
| Magnesium nitrate- Mg(NO <sub>3</sub> ) <sub>2</sub> | 1.8                                      | Calcium                     | 163.1 |
| Potassium chloride-KCl                               | 1.2                                      | Potassium                   | 50.5  |
| Sodium chloride-NaCl                                 | 9.7                                      | Sodium                      | 229.0 |

### Synthesis of graphene-based materials (GMBs)

#### Synthesis of graphene oxide

Graphene oxide was synthesised by the improved Hummer's method, outlined below (Marcano *et al.*, 2010). Natural graphite was ground and sieved to < 250 µm. Concentrated sulfuric acid and phosphoric acid (9:1) was combined and then cooled in freezer for 6 h. The acid mixture was added to graphite (2 g) and potassium permanganate (12 g) mixture then stirred at 55°C for 16 h. Ice was added to the reaction mixture with stirring until the light purple paste turned to a dark purple liquid. Hydrogen peroxide (approx. 3 mL) was added slowly during vigorous stirring until the reaction mixture turned a golden yellow colour. The reaction mixture was then centrifuged at 3402 RCF using a Thermo Scientific Sorvall Centrifuge (used in all further centrifugation in this study) and washed with deionised (DI) water, dilute HCl, followed by water x 2, and the solids combined to give GO as a dark brown paste.

#### Synthesis of graphene-iron hybrid aerogel (rGO-Fe)

The method for synthesis of GO functionalised with Fe nanoparticles was derived from Andjelkovic *et al.* (2015). Briefly, GO was added to milli-Q water (500 mL) to give a 2 mg/mL solution, which was sonicated for 30 min. The GO solution pH was adjusted to 2.5-3.0 and added to iron sulfate heptahydrate (14 g). The reaction mixture was stirred at 90 °C for 6 – 8 hours, before being washed using DI water until the supernatant went from green-tinged to clear, giving the reduced graphene-Fe (rGO-Fe) as a black suspension.

#### Synthesis of polyamine modified chemically reduced graphene oxide composite (rGO-N)

The chemically reduced amine functionalised GO composite was prepared following the method by Yap *et al.* (2020). Graphene oxide was added to milli-Q water (200 mL) to give a 2 mg/mL solution,

which was sonicated for 30 min. Tetraethylene pentaamine polymer hardener (1 g) was added to milli-Q water (20 mL) and stirred thoroughly, before being added to the GO solution. The solution was stirred at room temperature for 1 hour. Hydrazine (0.1 mL) was added to the reaction mixture, which was then stirred at 90 °C for 2 hours. The solid component of the reaction mixture was separated and washed with DI water x 2 to give the polyamine modified chemically reduced GO composite (rGO-N) as a black suspension.

### **Reduction of graphene oxide to form graphene**

Graphene was synthesised by chemically reducing the previously synthesised GO using hydrazine, according to the method by Kabiri *et al.* (2020). Hydrazine was added to dispersed 2 mg/mL GO (1  $\mu$ L per 3 mg of GO), heated with stirring at 80 °C for 3 hours, and the resulting solid washed with DI water (x3) to give GN as a black suspension.

### **Material characterisation**

The structure and functional groups of each compound were confirmed using Fourier transform infrared spectroscopy (FTIR), on a Thermo-Scientific Nicolet iS20 Smart iTX spectrometer (Figure S1). The specific surface area (SSA) was determined by measuring the absorbance of the sorbents in the presence of methylene blue solution according to the method by (Kabiri *et al.*, 2014) on a Shimadzu UV-Vis spectrophotometer at 650 nm. The particle size of each remediation material was measured using a Malvern Mastersizer 2000. The zero point of charge (if relevant) of the remediation materials in artificial soil pore water was determined using a Malvern Zetasizer.

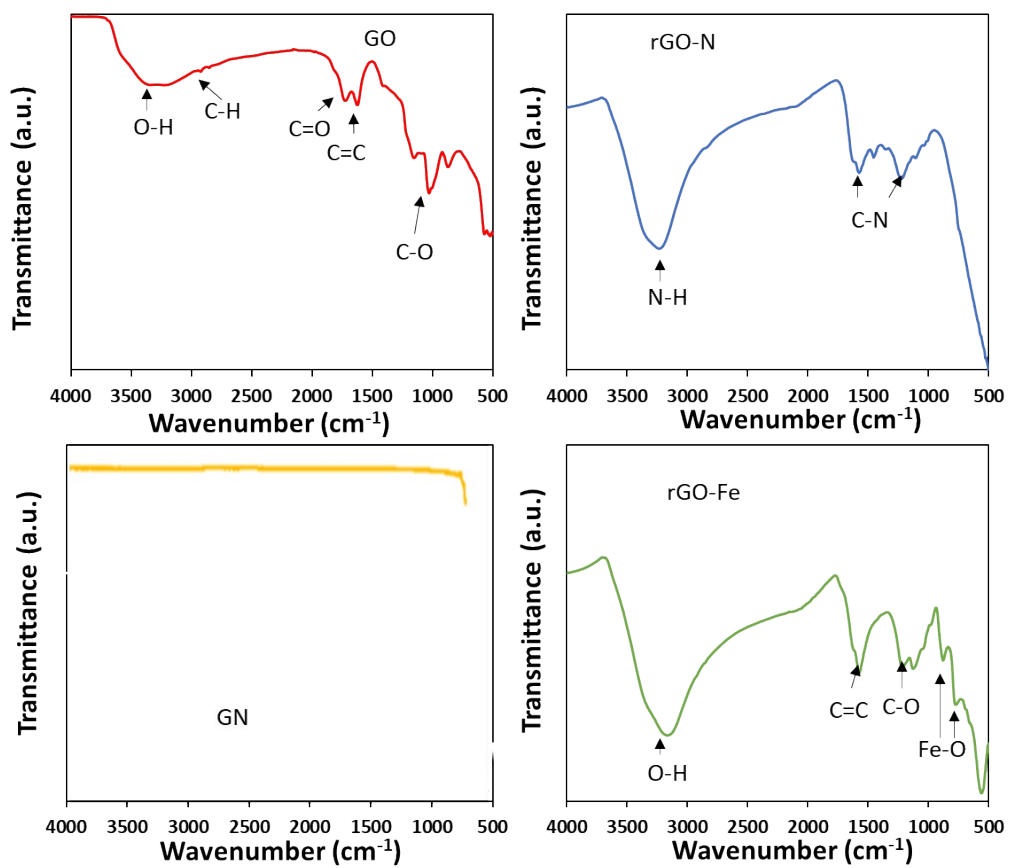

Figure S1. FTIR spectra of all synthesised graphene-based materials.

Table S2. Concentration of different PFAS in AFFF-solution. Diluted AFFF-solution was used for batch sorption experiments. (LOD, ND and NA refer to the method detection limit, not detected and not reported, respectively)

| PFAS                                    | Compound         | Detected concentration (µg/L) | Selected PFAS concentration in diluted AFFF-solution (µg/L) |
|-----------------------------------------|------------------|-------------------------------|-------------------------------------------------------------|
| Perfluoroalkyl carboxylic acids (PFCAs) | PFBA             | 399.1                         | NA                                                          |
|                                         | PFPeA            | 301                           | NA                                                          |
|                                         | PFHxA*           | 2205.1                        | 33.1±1.0                                                    |
|                                         | PFHpA            | 591.6                         | NA                                                          |
|                                         | PFOA             | 1734.9                        | NA                                                          |
|                                         | PFDA             | <LOD*                         | NA                                                          |
|                                         | PFUdA            | <LOD*                         | NA                                                          |
|                                         | PFDoA            | <LOD*                         | NA                                                          |
|                                         | PFTTrDA          | <LOD*                         | NA                                                          |
| PFTeDA                                  | <LOD*            | NA                            |                                                             |
| Perfluoroalkane sulfonic acids (PFSAAs) | PFBS             | 3088.4                        | NA                                                          |
|                                         | PFPeS            | 2099.2                        | NA                                                          |
|                                         | PFHxS*           | 18229                         | 166.0±4.7                                                   |
|                                         | PFHpS            | 1791                          | NA                                                          |
|                                         | PFOS             | 530840                        | NA                                                          |
|                                         | PFNS             | 558                           | NA                                                          |
| Perfluoroalkyl Sulfonamides             | PFDSA            | 305                           | NA                                                          |
|                                         | PFOSA            | 25.6                          | NA                                                          |
| Other PFAS                              | N-EtFOSAA        | 2.1                           | NA                                                          |
|                                         | N-AP-FHxSA*      | 4332.5                        | 46.0±3.2                                                    |
|                                         | N-CMAmP-6:2FOSA* | ND                            | NA                                                          |
|                                         | N-TAmP-FHxSA*    | 4124.1                        | 47.9±4.6                                                    |

Table S3. Selected physical and chemical properties of PFAS-contaminated soil.

|                 |          |      |
|-----------------|----------|------|
| Salinity EC 1:5 | dS/m     | 0.34 |
| pH 1:5 water    | pH units | 7.1  |
| Organic carbon  | %        | 0.8  |
| Clay            | %        | 2.5  |
| Sand            | %        | 92   |
| Silt            | %        | 5.6  |
| Texture         |          | Sand |

Table S4. Mean total concentrations of PFAS in soils and method detection limits of analysed PFAS (standard deviations are based on three replications).

| PFAS            | Concentration ( $\mu\text{g}/\text{kg}$ ) | LOR |
|-----------------|-------------------------------------------|-----|
| PFBS            | 12.3 $\pm$ 0.3                            | 0.2 |
| PFPeS           | 21 $\pm$ 0.8                              | 0.2 |
| PFHxS           | 293.3 $\pm$ 10                            | 0.2 |
| PFHpS           | 72.7 $\pm$ 3.5                            | 0.2 |
| PFOS            | 14633.3 $\pm$ 585.9                       | 0.2 |
| PFDS            | 133.7 $\pm$ 3.1                           | 0.2 |
| PFBA            | 24.2 $\pm$ 1.6                            | 1   |
| PFPeA           | 104.3 $\pm$ 5.1                           | 0.2 |
| PFHxA           | 27.7 $\pm$ 1.3                            | 0.2 |
| PFHpA           | 80.5 $\pm$ 4.2                            | 0.2 |
| PFOA            | 22.1 $\pm$ 0.9                            | 0.2 |
| PFNA            | 14.8 $\pm$ 0.8                            | 0.2 |
| PFDA            | 11.3 $\pm$ 0.8                            | 0.2 |
| PFUnDA          | 7 $\pm$ 1.3                               | 0.2 |
| PFDoDA          | 24.2 $\pm$ 1.6                            | 0.2 |
| FOSA            | 99 $\pm$ 9                                | 0.2 |
| 8:2 FTS         | 16.3 $\pm$ 2.5                            | 0.5 |
| 10:2 FTS        | 140 $\pm$ 8.4                             | 0.5 |
| N-AP-FHxSA      | 533 $\pm$ 8.2                             | 0.8 |
| N-TAmP-FHXSA    | 1328.2 $\pm$ 221                          | 0.9 |
| 5-1-2 FtB       | 1386.9 $\pm$ 1.7                          | 0.6 |
| N-CMAmP-6:2FOSA | 1171.8 $\pm$ 86                           | 1.3 |
| 6:2 FTS         | 43.2 $\pm$ 1.4                            | 0.4 |
| 8:2 FTS         | 178.2 $\pm$ 24                            | 0.4 |

Table S5. The method detection limit (LOD) and quantification (LOQ) on the LC-MS/MS.

| PFAS            | LOD( $\mu\text{g/L}$ ) | LOQ( $\mu\text{g/L}$ ) |
|-----------------|------------------------|------------------------|
| N-AP-FHxSA      | 0.8                    | 2.4                    |
| N-TAmP-FHxSA    | 0.9                    | 2.7                    |
| N-CMAmP-6:2FOSA | 1.3                    | 4.0                    |
| PFHxA           | 0.4                    | 1.3                    |
| PFHxS           | 1.3                    | 3.9                    |

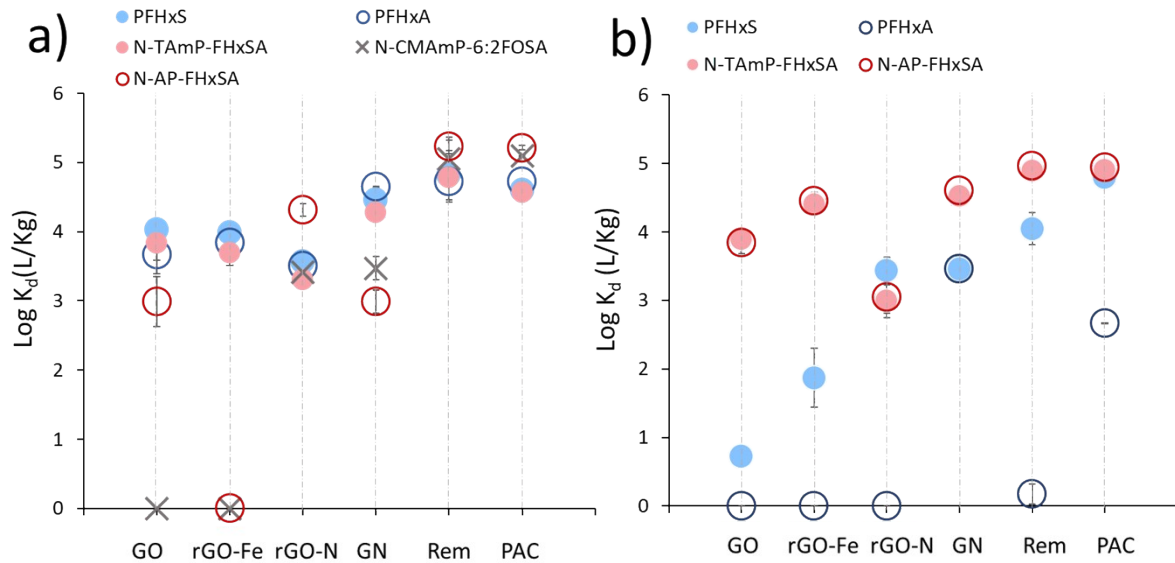

Figure S2. Partitioning of the selected anionic and zwitterionic PFAS to different GNBs, PAC and GAC using a) artificial PFAS solution and b) AFFF-spiked solution.

### Calculations

PFAS sorbed is presented in terms of the  $K_d$ , the solid/liquid partition coefficient, of the PFAS onto the remediation agent, through the following equation in the units of L/kg.

$$K_d = \frac{[\text{PFAS sorbed to sorptive materials}]}{[\text{PFAS remained in the liquid}]} \quad \text{eq.1}$$

Where, the amount of PFAS sorbed on sorptive material ( $\mu\text{g/kg}$ ) calculated following the eq. 2

$$[\text{PFAS sorbed to sorptive materials}] = \frac{([\text{PFAS}]_{\text{Initial}} - [\text{PFAS}]_{\text{Rem}}) \left(\frac{\mu\text{g}}{\text{L}}\right) \times V (\text{L})}{m (\text{kg})} \quad \text{eq. 2}$$

and the amount of PFAS remained in the artificial soil pore water after remediation was measured by LC-MS/MS and reported as  $\mu\text{g/L}$ . It should be noted that the reported  $K_d$  does not represent the equilibrium  $K_d$  values.

Each sorptive material was tested individually in artificial soil pore water for remediation ability on the artificial PFAS mixture of increasing concentrations, from 10 µg/L – 300 µg/L to attempt to pinpoint the sorption mechanism and capacity of each remediation agent. The data was fitted against two linear adsorption models, Langmuir and Freundlich (Ayawei *et al.*, 2017). The Langmuir adsorption model takes the form of the following equation (eq. 3).

$$\frac{C_e}{Q_e} = \frac{1}{Q_{max}} \times C_e + \frac{1}{Q_{max} \times K_L} \quad \text{eq.3}$$

Where,  $Q_e$  = quantity of adsorbate adsorbed by the adsorbent (mg/g),  $Q_{max}$  is the maximum amount of adsorbate that the adsorbent can adsorb (mg),  $K_L$  is the Langmuir equilibrium constant, and  $C_e$  is the equilibrium concentration of the adsorbate remaining in solution (µg/L).

The Freundlich isotherm model can be found below.

$$\text{Log}(Q_e) = n \text{Log}(C_e) + \text{Log}(K_F) \quad \text{eq. 4}$$

Where,  $K_F$  is the Freundlich equilibrium constant ((µg/mg)/(µg/L)<sup>n</sup>), and n is the fitting parameter.

The percentage immobilised referred to the percentage of the PFAS compound immobilised on the remediation material. It was calculated using the following equation.

$$\% \text{ immobilised} = 100 - \left[ \left( \frac{[PFAS]_{\text{immobilised}}}{[PFAS]_{\text{unimmobilised}}} \right) \times 100 \right] \quad \text{eq.5}$$

Where,  $[PFAS]_{\text{immobilised}}$  refers to concentration of PFAS (µg/L) in the leachates of treated soil, and  $PFAS_{\text{unimmobilised}}$  refers to the concentration of PFAS (µg/L) in the untreated soil leachate.

### Statistical analysis and experimental design

A range of statistical methods were implemented across the study. The batch sorption experiment was a 5 x 5 x 2 randomised block design with 3 replications. An analysis of variance (ANOVA) was performed using IBM-SPSS statistical software to obtain least significant differences (LSDs) (see Table S8a).

The experiment on the effect of pH was split into 2 x factorial design experiments, 6 remediation agents x 5 PFAS x 3 pH values for the artificial PFAS mixture, and 6 remediation agents x 4 PFAS x 3 pH values for the AFFF extract. Each set of data was analysed using IBM-SPSS statistical software to perform a multivariate ANOVA utilising LSDs of homogeneous subsets (see Table). Due to the magnitude of difference between the results for the anions (PFHxS and PFHxA) and the zwitterions for

the artificial PFAS mixture, the two subsets were split into their own ANOVA analyses. These results and further information are presented in Table S6-8.

Table S6. a) ANOVA test for between subjects' differences to determine significant differences in the mean unadjusted Log  $K_d$  in the artificial PFAS study, b) Post hoc test (multiple comparisons of homogeneous subsets) to determine LSDs for the artificial PFAS mixture and c) Post hoc test (multiple comparisons of homogeneous subsets) to determine LSDs for all data – AFFF- spiked solution.

Table S6a: ANOVA test for between subjects' differences to determine significant differences in the mean unadjusted Log  $K_d$  in the artificial PFAS study

| Source                   | Significance |
|--------------------------|--------------|
| PFAS type                | <0.001       |
| pH                       | <0.001       |
| sorbents                 | <0.001       |
| PFAS type * pH           | <0.001       |
| PFAS type * sorbent      | <0.001       |
| pH * sorbent             | <0.001       |
| PFAS type * pH * sorbent | <0.001       |



Table S6b: Post hoc test (multiple comparisons of homogeneous subsets) to determine LSDs for the artificial PFAS mixture.

| (I) sorbent    | (J) sorbent    | Sig.   | (I) PFAS type          | (J) PFAS type          | Sig.              |
|----------------|----------------|--------|------------------------|------------------------|-------------------|
|                |                |        | <b>N-AP-FHxSA</b>      | <b>N-CMAmP-6:2FOSA</b> | <0.001            |
| <b>rGO-Fe</b>  | <b>GN</b>      | 0.9    |                        | <b>N-TAmP-FHxSA</b>    | 0.383             |
|                | <b>GO</b>      | 0.9    |                        | <b>PFHxA</b>           | 0.633             |
|                | <b>rGO-N</b>   | 0.9    |                        | <b>PFHxS</b>           | 0.595             |
|                | <b>PAC</b>     | 0.002  | <b>N-CMAmP-6:2FOSA</b> | <b>N-AP-FHxSA</b>      | <0.001            |
|                | <b>RemBind</b> | <0.001 |                        | <b>N-TAmP-FHxSA</b>    | <0.001            |
| <b>GN</b>      | <b>rGOFe</b>   | 0.9    |                        | <b>PFHxA</b>           | <0.001            |
|                | <b>GO</b>      | 0.8    |                        | <b>PFHxS</b>           | <0.001            |
|                | <b>rGO-N</b>   | 0.8    | <b>N-TAmP-FHxSA</b>    | <b>N-AP-FHxSA</b>      | 0.383             |
|                | <b>PAC</b>     | 0.004  |                        | <b>N-CMAmP-6:2FOSA</b> | <0.001            |
|                | <b>RemBind</b> | <0.001 |                        | <b>PFHxA</b>           | 0.178             |
| <b>GO</b>      | <b>rGO-Fe</b>  | 0.9    |                        | <b>PFHxS</b>           | 0.733             |
|                | <b>GN</b>      | 0.8    | <b>PFHxA</b>           | <b>N-AP-FHxSA</b>      | 0.633             |
|                | <b>rGO-N</b>   | 0.9    |                        | <b>N-CMAmP-6:2FOSA</b> | <0.001            |
|                | <b>PAC</b>     | 0.002  |                        | <b>N-TAmP-FHxSA</b>    | 0.178             |
|                | <b>RemBind</b> | <0.001 |                        | <b>PFHxS</b>           | 0.313             |
| <b>rGO-N</b>   | <b>rGO-Fe</b>  | 1      |                        | <b>PFHxS</b>           | <b>N-AP-FHxSA</b> |
|                | <b>GN</b>      | 0.8    | <b>N-CMAmP-6:2FOSA</b> |                        | <0.001            |
|                | <b>GO</b>      | 1      | <b>N-TAmP-FHxSA</b>    |                        | 0.733             |
|                | <b>PAC</b>     | 0.002  | <b>PFHxA</b>           |                        | 0.313             |
|                | <b>RemBind</b> | <0.001 |                        |                        |                   |
| <b>PAC</b>     | <b>RGO-Fe</b>  | 0.002  | <b>(I) pH</b>          | <b>(J) pH</b>          | <b>Sig.</b>       |
|                | <b>GN</b>      | 0.004  | <b>4</b>               | <b>6.5</b>             | 0.033             |
|                | <b>GO</b>      | 0.002  |                        | <b>9</b>               | <0.001            |
|                | <b>rGO-N</b>   | 0.002  | <b>6.5</b>             | <b>4</b>               | 0.033             |
|                | <b>RemBind</b> | <0.001 |                        | <b>9</b>               | <0.001            |
| <b>RemBind</b> | <b>rGO-Fe</b>  | <0.001 | <b>9</b>               | <b>4</b>               | <0.001            |
|                | <b>GN</b>      | <0.001 |                        | <b>6.5</b>             | <0.001            |
|                | <b>GO</b>      | <0.001 |                        |                        |                   |
|                | <b>rGO-N</b>   | <0.001 |                        |                        |                   |
|                | <b>PAC</b>     | <0.001 |                        |                        |                   |

Table S6c: Post hoc test (multiple comparisons of homogeneous subsets) to determine LSDs for all data – AFFF- spiked solution.

| <b>(I) sorbent</b> | <b>(J) sorbent</b> | <b>Sig.</b> | <b>(I) PFAS type</b> | <b>(J) PFAS type</b> | <b>Sig.</b> |
|--------------------|--------------------|-------------|----------------------|----------------------|-------------|
|                    |                    |             | <b>N-AP-FHxSA</b>    | <b>N-TAmP-FHxSA</b>  | <0.001      |
| <b>rGO-Fe</b>      | <b>GN</b>          | 0.1         |                      | <b>PFHxA</b>         | <0.001      |
|                    | <b>GO</b>          | 0.8         |                      | <b>PFHxS</b>         | <0.001      |
|                    | <b>rGO-N</b>       | 0.6         | <b>N-TAmP-FHxSA</b>  | <b>N-AP-FHxSA</b>    | <0.001      |
|                    | <b>PAC</b>         | <0.001      |                      | <b>PFHxA</b>         | <0.001      |
|                    | <b>RemBind</b>     | <0.001      |                      | <b>PFHxS</b>         | <0.001      |
| <b>GN</b>          | <b>rGO-Fe</b>      | 0.1         | <b>PFHxA</b>         | <b>N-AP-FHxSA</b>    | <0.001      |
|                    | <b>GO</b>          | 0.1         |                      | <b>N-TAmP-FHxSA</b>  | <0.001      |
|                    | <b>rGO-N</b>       | 0.03        |                      | <b>PFHxS</b>         | 0.007       |
|                    | <b>PAC</b>         | <0.001      | <b>PFHxS</b>         | <b>N-AP-FHxSA</b>    | <0.001      |
|                    | <b>RemBind</b>     | <0.001      |                      | <b>N-TAmP-FHxSA</b>  | <0.001      |
| <b>GO</b>          | <b>rGO-Fe</b>      | 0.8         |                      | <b>PFHxA</b>         | 0.007       |
|                    | <b>GN</b>          | 0.06        |                      |                      |             |
|                    | <b>rGO-N</b>       | 0.8         |                      |                      |             |
|                    | <b>PAC</b>         | <0.001      |                      |                      |             |
|                    | <b>RemBind</b>     | <0.001      |                      |                      |             |
| <b>rGO-N</b>       | <b>rGO-Fe</b>      | 0.6         |                      |                      |             |
|                    | <b>GN</b>          | 0.03        |                      |                      |             |
|                    | <b>GO</b>          | 0.8         |                      |                      |             |
|                    | <b>PAC</b>         | <0.001      |                      |                      |             |
|                    | <b>RemBind</b>     | <0.001      |                      |                      |             |
| <b>PAC</b>         | <b>rGO-Fe</b>      | <0.001      |                      |                      |             |
|                    | <b>GN</b>          | <0.001      |                      |                      |             |
|                    | <b>GO</b>          | <0.001      |                      |                      |             |
|                    | <b>rGO-N</b>       | <0.001      |                      |                      |             |
|                    | <b>RemBind</b>     | <0.001      |                      |                      |             |
| <b>RemBind</b>     | <b>rGO-Fe</b>      | <0.001      |                      |                      |             |
|                    | <b>GN</b>          | <0.001      |                      |                      |             |
|                    | <b>GO</b>          | <0.001      |                      |                      |             |
|                    | <b>rGO-N</b>       | <0.001      |                      |                      |             |
|                    | <b>PAC</b>         | <0.001      |                      |                      |             |

Table S7: Post hoc test (multiple comparisons of homogeneous subsets) to determine LSDs for zwitterionic PFAS only – artificial PFAS mixture.

| (I) pH | (J) pH | Sig.   | (I) PFAS type   | (J) PFAS type   | Sig.   |
|--------|--------|--------|-----------------|-----------------|--------|
| 4      | 6.5    | <0.001 | N-AP-FHxSA      | N-CMAmP-6:2FOSA | <0.001 |
|        | 9      | 0.9    |                 | N-TAmP-FHxSA    | 0.5    |
| 6.5    | 4      | <0.001 | N-CMAmP-6:2FOSA | N-AP-FHxSA      | <0.001 |
|        | 9      | <0.001 |                 | N-TAmP-FHxSA    | <0.001 |
| 9      | 4      | 0.9    | N-TAmP-FHxSA    | N-AP-FHxSA      | 0.5    |
|        | 6.5    | <0.001 |                 | N-CMAmP-6:2FOSA | <0.001 |

Table S8: Post hoc test (multiple comparisons of homogeneous subsets) to determine LSDs for anionic PFAS only – artificial PFAS mixture.

| (I) sorbent | (J) sorbent | Sig.   | (I) pH | (J) pH | Sig.   |
|-------------|-------------|--------|--------|--------|--------|
| rGO-Fe      | GN          | 0.7    | 4      | 6.5    | <0.001 |
|             | GO          | 1      |        | 9      | 0.9    |
|             | rGO-N       | 0.9    |        | 6.5    | 4      |
|             | PAC         | <0.001 | 9      |        | <0.001 |
|             | RemBind     | <0.001 | 9      | 4      | 0.9    |
|             |             | 6.5    |        | <0.001 |        |
| GN          | rGO-Fe      | 0.8    |        |        |        |
|             | GO          | 0.8    |        |        |        |
|             | rGO-N       | 0.8    |        |        |        |
|             | PAC         | <0.001 |        |        |        |
|             | RemBind     | <0.001 |        |        |        |
| GO          | rGO-Fe      | 1      |        |        |        |
|             | GN          | 0.8    |        |        |        |
|             | rGO-N       | 0.9    |        |        |        |
|             | PAC         | <0.001 |        |        |        |
|             | RemBind     | <0.001 |        |        |        |
| rGO-N       | rGO-Fe      | 0.9    |        |        |        |
|             | GN          | 0.8    |        |        |        |
|             | GO          | 0.9    |        |        |        |
|             | PAC         | <0.001 |        |        |        |
|             | RemBind     | <0.001 |        |        |        |
| PAC         | rGO-Fe      | <0.001 |        |        |        |
|             | GN          | <0.001 |        |        |        |
|             | GO          | <0.001 |        |        |        |
|             | rGO-N       | <0.001 |        |        |        |
|             | RemBind     | <0.001 |        |        |        |
| RemBind     | rGO-Fe      | <0.001 |        |        |        |
|             | GN          | <0.001 |        |        |        |

|       |        |
|-------|--------|
| GO    | <0.001 |
| rGO-N | <0.001 |
| PAC   | <0.001 |

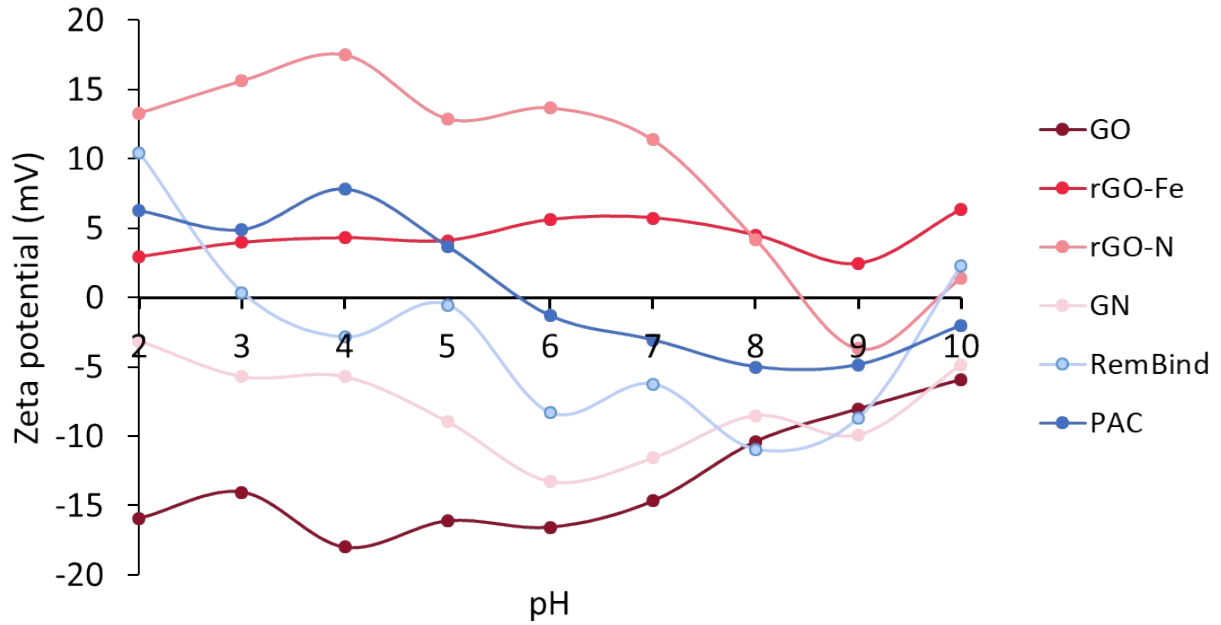

Figure S3. Zeta potential of graphene based materials, PAC and RemBind in soil pore water.

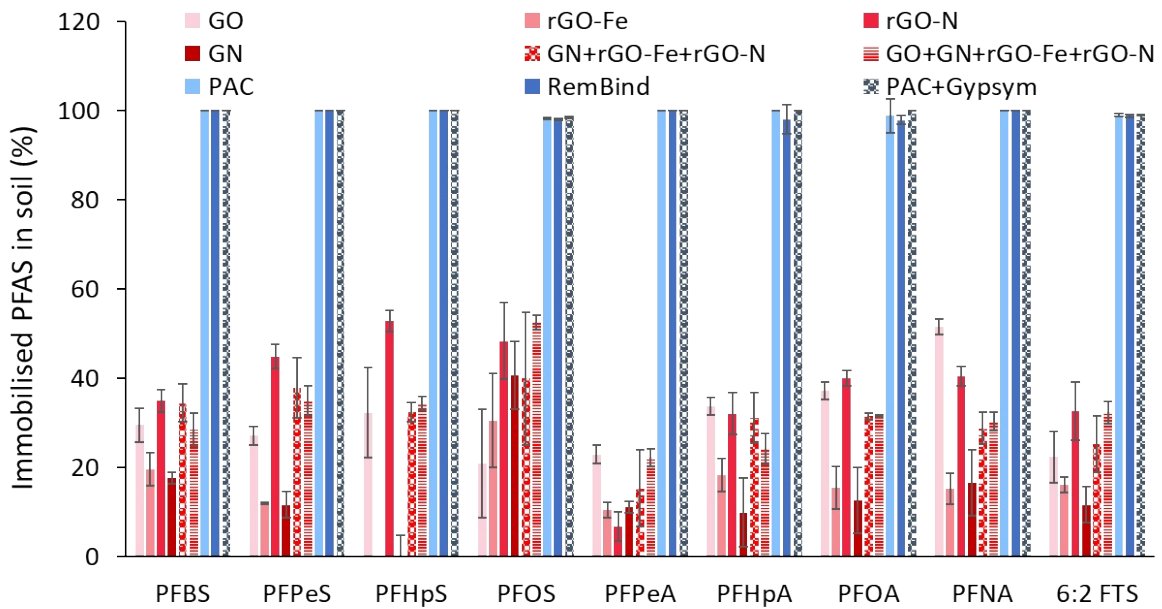

Figure S4. Percentage of immobilised PFAS in treated soil with different sorbents. Error bars are based on standard deviations of n = 3 samples.

## References:

- Andjelkovic, I., D.N.H. Tran, S. Kabiri, S. Azari, M. Markovic and D. Losic, 2015. Graphene aerogels decorated with  $\alpha$ -FeOOH nanoparticles for efficient adsorption of arsenic from contaminated waters. *ACS Applied Materials & Interfaces*, 7(18): 9758-9766. Available from <http://dx.doi.org/10.1021/acsami.5b01624>. DOI 10.1021/acsami.5b01624.
- Ayawei, N., A.N. Ebelegi and D. Wankasi, 2017. Modelling and interpretation of adsorption isotherms. *Journal of Chemistry*, 2017: 3039817. Available from <https://doi.org/10.1155/2017/3039817>. DOI 10.1155/2017/3039817.
- Kabiri, S., D.N.H. Tran, T. Altalhi and D. Losic, 2014. Outstanding adsorption performance of graphene-carbon nanotube aerogels for continuous oil removal. *Carbon*, 80: 523-533. Available from <https://www.sciencedirect.com/science/article/pii/S000862231400832X>. DOI <https://doi.org/10.1016/j.carbon.2014.08.092>.
- Kabiri, S., D.N.H. Tran, R. Baird, M.J. McLaughlin and D. Losic, 2020. Revealing the dependence of graphene concentration and physicochemical properties on the crushing strength of co-granulated fertilizers by wet granulation process. *Powder Technology*, 360: 588-597. DOI 10.1016/j.powtec.2019.10.047.
- Marcano, D.C., D.V. Kosynkin, J.M. Berlin, A. Sinitskii, Z. Sun, A. Slesarev, L.B. Alemany, W. Lu and J.M. Tour, 2010. Improved synthesis of graphene oxide. *ACS Nano*, 4(8): 4806-4814. Available from <https://doi.org/10.1021/nn1006368>. DOI 10.1021/nn1006368.
- Yap, P.L., T.T. Tung, S. Kabiri, N. Matulick, D.N.H. Tran and D. Losic, 2020. Polyamine-modified reduced graphene oxide: A new and cost-effective adsorbent for efficient removal of mercury in waters. *Separation and Purification Technology*, 238: 116441. Available from <https://www.sciencedirect.com/science/article/pii/S138358661933730X>. DOI <https://doi.org/10.1016/j.seppur.2019.116441>.
